# Supplementary material for: 徒手筋力測定器による股関節外転筋力について(測定・評価)
Source: Royal Society of Chemistry journal article supplement (doi:10.1039/d3cp04995g), 2002-04-20
Supplement: d3cp04995g1.pdf [file d3cp04995g1.pdf]

Supporting information for

## **Carbon Dioxide Activation by Discandium Dioxide Cation in the Gas Phase: A Combined Investigation of Infrared Photodissociation Spectroscopy and DFT Calculations**

Pengcheng Liu,<sup>1,2,†</sup> Jia Han,<sup>3,†</sup> Yan Chen,<sup>4</sup> Shun Lu,<sup>4</sup> Quyan Su,<sup>4</sup>

Xiaoguo Zhou,<sup>3,4,\*</sup> Weijun Zhang<sup>1,\*</sup>

1. *Anhui Institute of Optics and Fine Mechanics, Hefei Institutes of Physical Science, Chinese Academy of Sciences, Hefei 230031, China*
2. *Science Island Branch, Graduate School, University of Science and Technology of China, Hefei 230026, China*
3. *Hefei National Laboratory for Physical Sciences at the Microscale, University of Science and Technology of China, Hefei 230026, China*
4. *Department of Chemical Physics, University of Science and Technology of China, Hefei 230026, China*

### **Contents:**

**Figure S1.** Schematic view of the experimental instrument consisting of a collinear tandem time-of-flight mass spectrometer coupled with a pulsed laser vaporization ion source.

**Figure S2.** The energetically lowest-lying isomer structures of  $\text{Sc}_2\text{O}_2^+$  cation in the doublet, quartet and sextet states calculated at the PBE0-D3(BJ)/def2-TZVP level of theory, respectively. Relative Gibbs free energies (at 298 K) are given in kcal/mol. Bond lengths are noted in Å.

**Figure S3.** NPA (Natural Population Analysis) atomic charge distribution of the lowest-energy isomers in N, S and D groups calculated at the PBE0-D3(BJ)/def2-TZVP level of theory.

**Figure S4.** Typical TOF mass spectrum produced by pulsed laser vaporization of a scandium metal target in expansion of helium seeded with carbon dioxide.

**Table S1.** Binding energies of successive CO<sub>2</sub> ligands calculated for isomers of [Sc<sub>2</sub>O<sub>2</sub>(CO<sub>2</sub>)<sub>n</sub>]<sup>+</sup> (n = 1–4) complex ions at the PBE0-D3(BJ)/def2-TZVP level of theory.

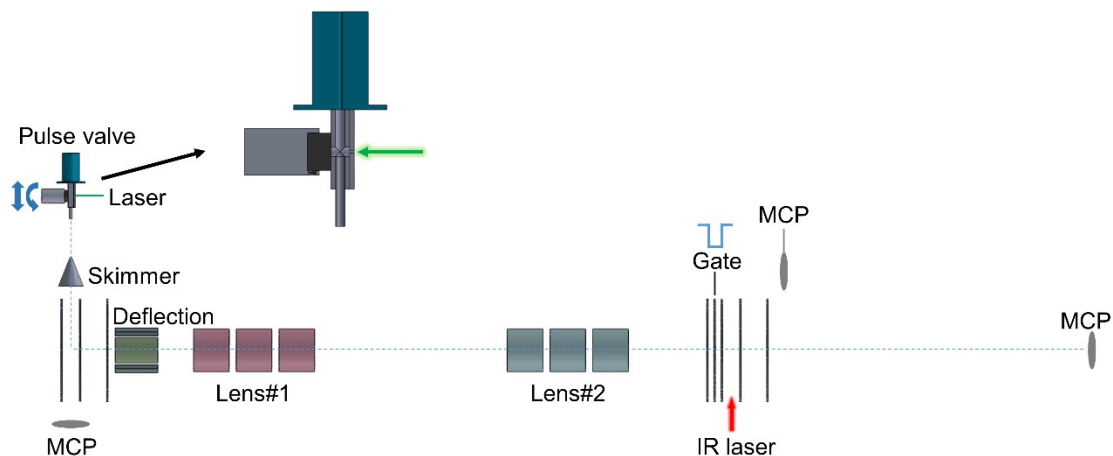

**Figure S1.** Schematic view of the experimental instrument consisting of a collinear tandem time-of-flight mass spectrometer coupled with a pulsed laser vaporization ion source.

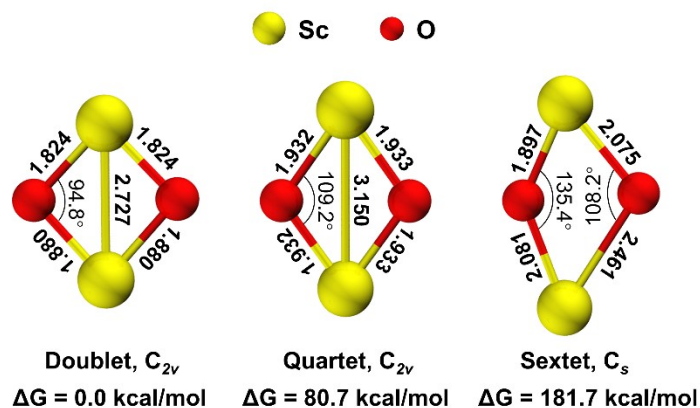

**Figure S2.** The energetically lowest-lying isomer structures of Sc<sub>2</sub>O<sub>2</sub><sup>+</sup> cation in the doublet, quartet and sextet states calculated at the PBE0-D3(BJ)/def2-TZVP level of theory, respectively. Relative Gibbs free energies (at 298 K) are given in kcal/mol. Bond lengths are noted in Å.

$$\text{Distortion energy}([\text{Sc}_2\text{O}_2]) = E([\text{Sc}_2\text{O}_2]_{\text{TS}}) - E([\text{Sc}_2\text{O}_2]_{\text{free}})$$

$$\text{Distortion energy}([\text{CO}_2]) = E([\text{CO}_2]_{\text{TS}}) - E([\text{CO}_2]_{\text{free}})$$

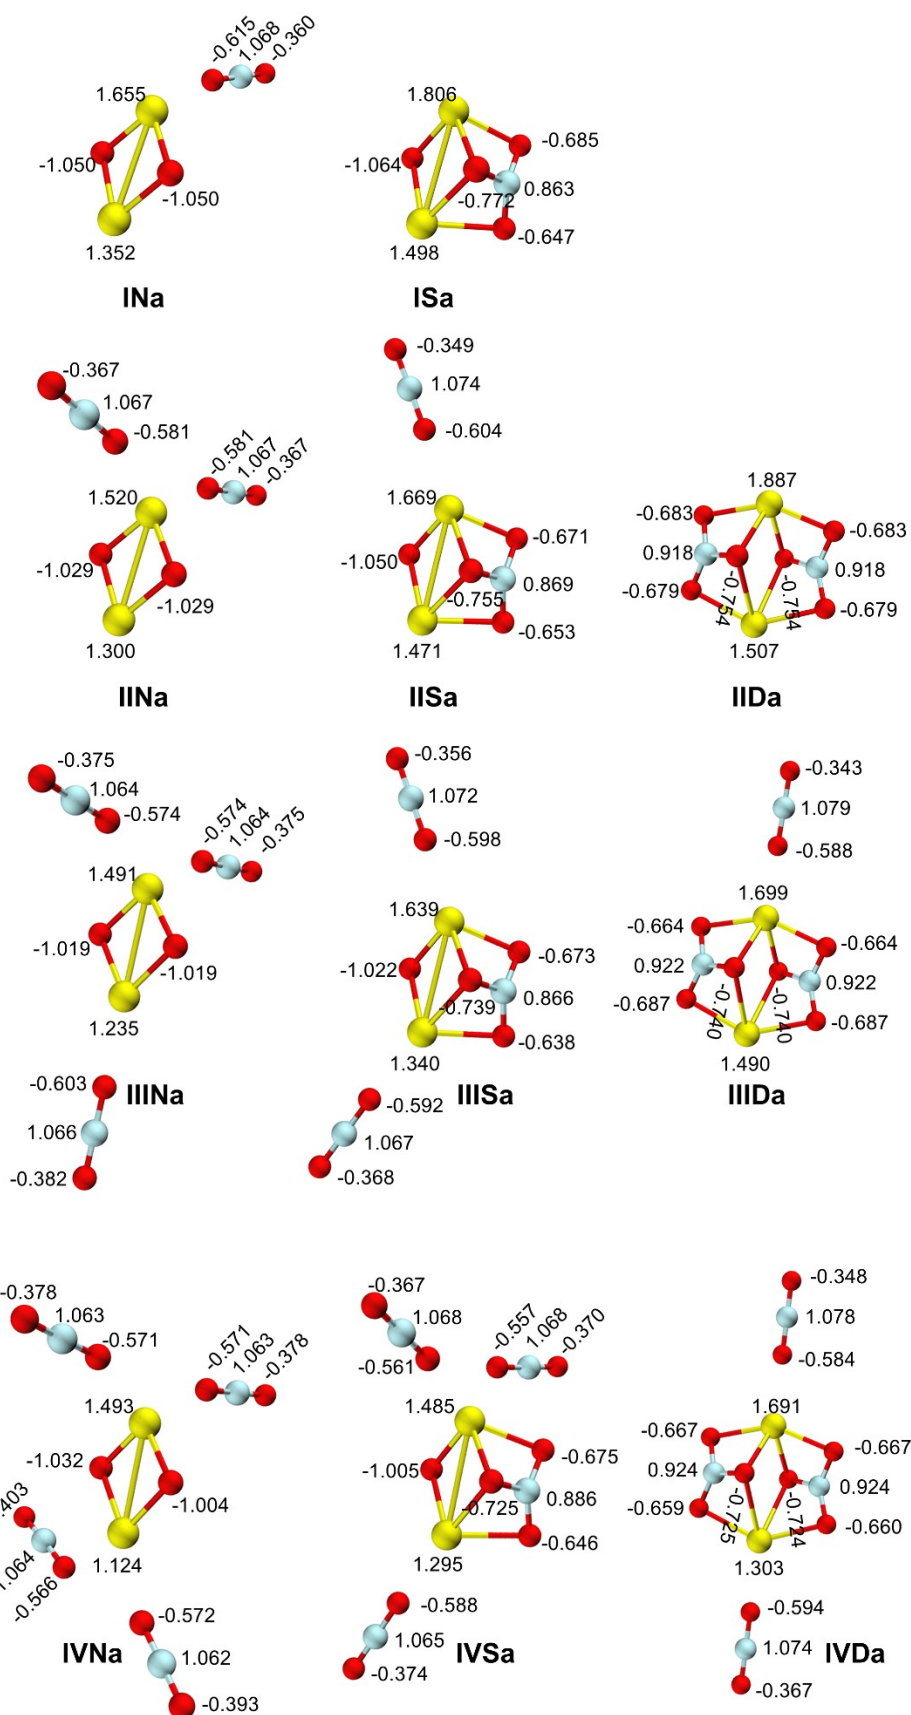

**Figure S3.** NPA (Natural Population Analysis) atomic charge distribution of the lowest-energy isomers in N, S and D groups calculated at the PBE0-D3(BJ)/def2-TZVP level of theory.

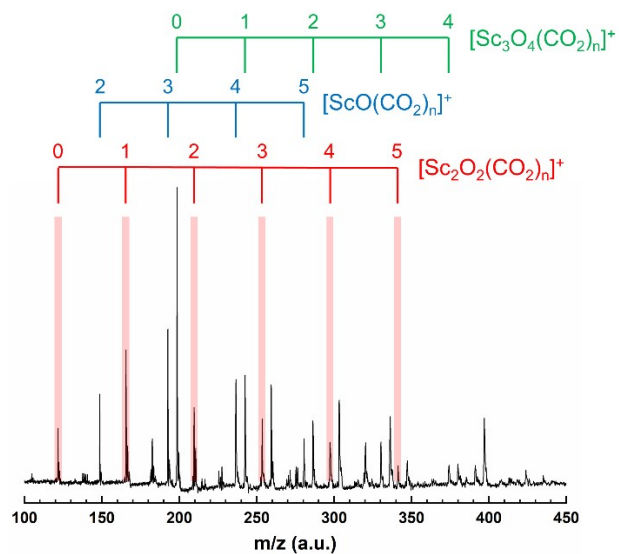

**Figure S4.** Typical TOF mass spectrum produced by pulsed laser vaporization of a scandium metal target in expansion of helium seeded with carbon dioxide.

**Table S1.** Binding energies of  $\text{CO}_2$  ligands calculated for isomers of  $[\text{Sc}_2\text{O}_2(\text{CO}_2)_n]^+$  ( $n = 1-4$ ) complex ions at the PBE0-D3(BJ)/def2-TZVP level of theory.

|            | Binding energy (kcal/mol) |      |      |      |
|------------|---------------------------|------|------|------|
|            | Na                        | Nb   | Sa   | Da   |
| <b>I</b>   | 17.7                      |      |      |      |
| <b>II</b>  | 17.4                      | 15.0 | 20.8 |      |
| <b>III</b> | 13.1                      | 11.6 | 17.9 | 22.4 |
| <b>IV</b>  | 11.1                      |      | 15.9 | 17.2 |
